# Supplementary material for: Variability in venom composition of European viper subspecies limits the cross-effectiveness of antivenoms
Source: PubMed Central journal article supplement (PMC6026201; doi:10.1038/s41598-018-28135-0), 2018-06-29
Supplement: 41598_2018_28135_MOESM1_ESM.pdf [file 41598_2018_28135_MOESM1_ESM.pdf]

# Variability in venom composition of European viper subspecies limits the cross-effectiveness of antivenoms.

Giulia Zanetti, Elisa Duregotti, Carlo Alessandro Locatelli, Andrea Giampreti, Davide Lonati, Ornella Rossetto and Marco Pirazzini

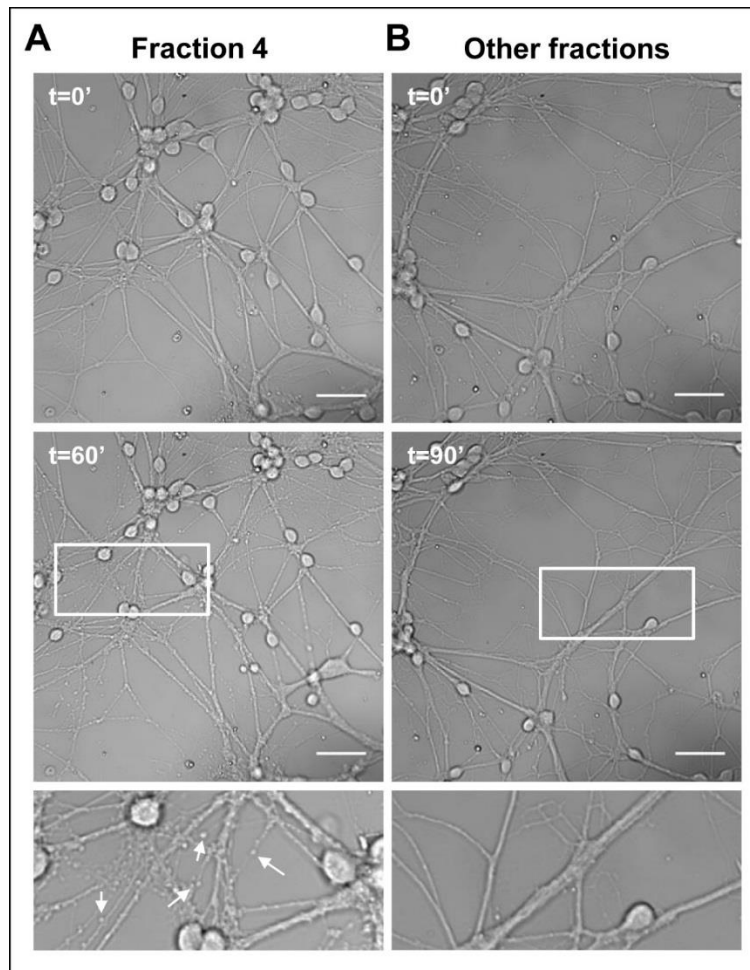

**Fig S1. *V. aspis* neurotoxicity is retained by the venom fraction containing the PLA<sub>2</sub> component.**

The venom of *V. Aspis* was fractionated by size exclusion chromatography and CGNs were treated with (A) the fraction containing the PLA<sub>2</sub> component (0.25 µg/ml) or (B) all other fractions re-mixed together (0.25 µg/ml). Only the PLA<sub>2</sub> fraction causes axon bulges. Pictures show most significant frames coming from supplementary Movie M4 and M5 and are representative of a typical time course. Scale bar=30 µm.

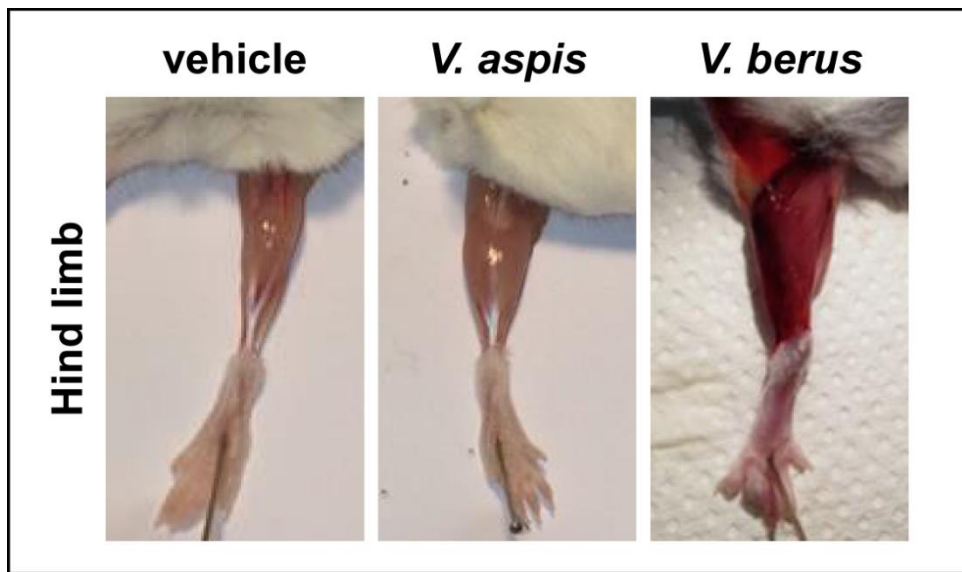

**Fig S2. *V. berus* causes haemostatic imbalance upon *in vivo* injection.** Vehicle or *V. aspis* venom (100  $\mu\text{g}/\text{Kg}$ ) or *V. berus* venom (100  $\mu\text{g}/\text{Kg}$ ) were injected at the level of the hind paw. After 48 hours the limb was skinned. *V. berus* venom causes a copious haemorrhage, whereas *V. aspis* does not induces any macroscopic effects.

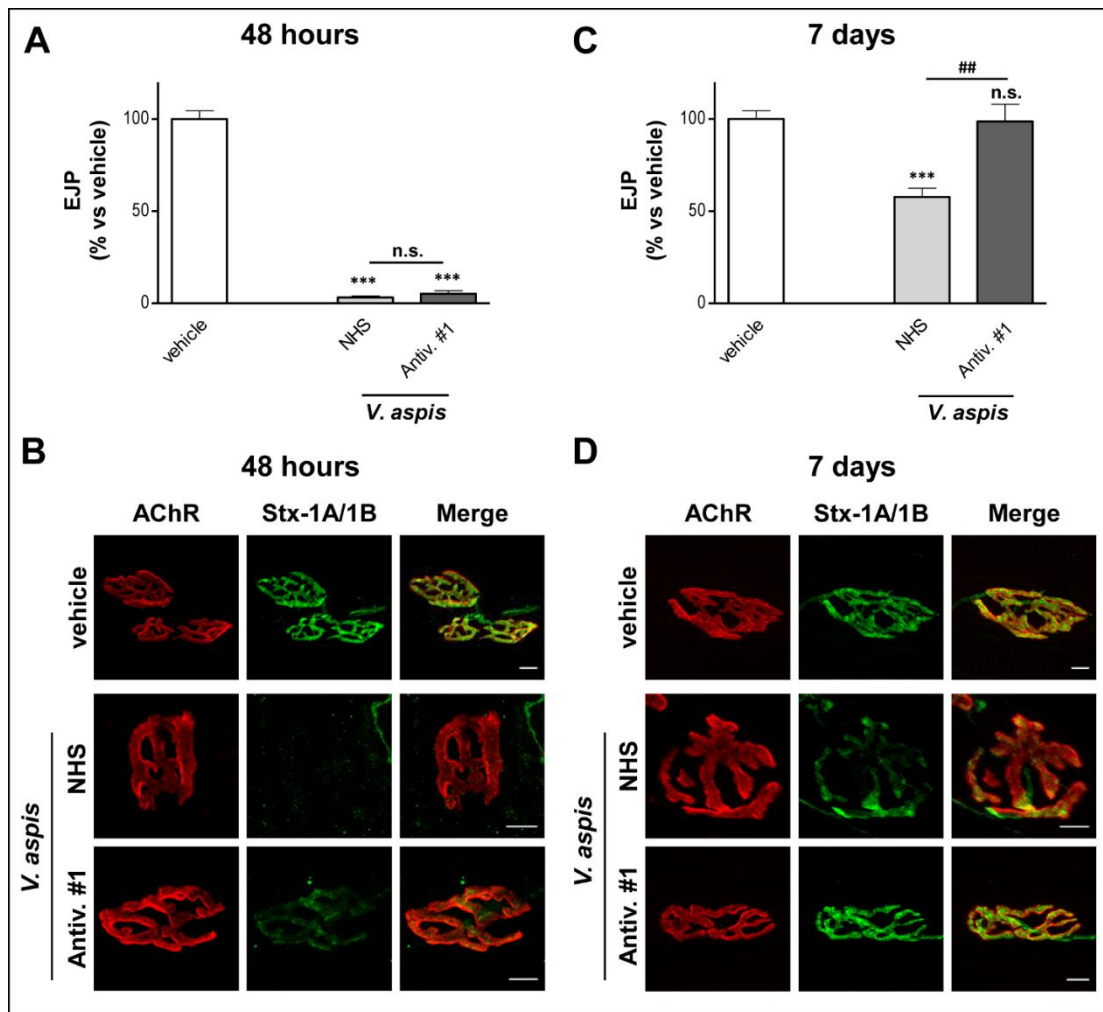

**Fig S3. High amount of Antivenom#1 slightly speeds up recovery from neuromuscular paralysis.** Electrophysiological recordings of EJP from mice solei **(A)** 48 h or **(B)** 7 days after injection in the hind limb of *V. aspis* venom (100  $\mu\text{g}/\text{Kg}$ ) pre-incubated with Antivenom #1 (15:1 antivenom/venom- $\text{LD}_{50}$  ratio) or NHS. Bars represent the average EJP amplitude of 15 fibres per muscle from at least three different mice per condition, expressed as a percentage of control EJP (injection of the sole vehicle); paired *t*-test, \* $p < 0.01$ , \*\* $p < 0.001$ , \*\*\* $p < 0.0001$  versus control (vehicle) or # $p < 0.01$ , ## $p < 0.001$ , ### $p < 0.0001$  versus NHS; error bars represent s.e.m.; n.s.=not significant. After electrophysiology, soleus muscles were imaged for the presynaptic markers syntaxin-1A/1B (green) and for the postsynaptic ACh receptors (AChR, red) to evaluate NMJ integrity **(B)** 48 h or **(D)** 7 days post injection. Scale bar=10  $\mu\text{m}$ .

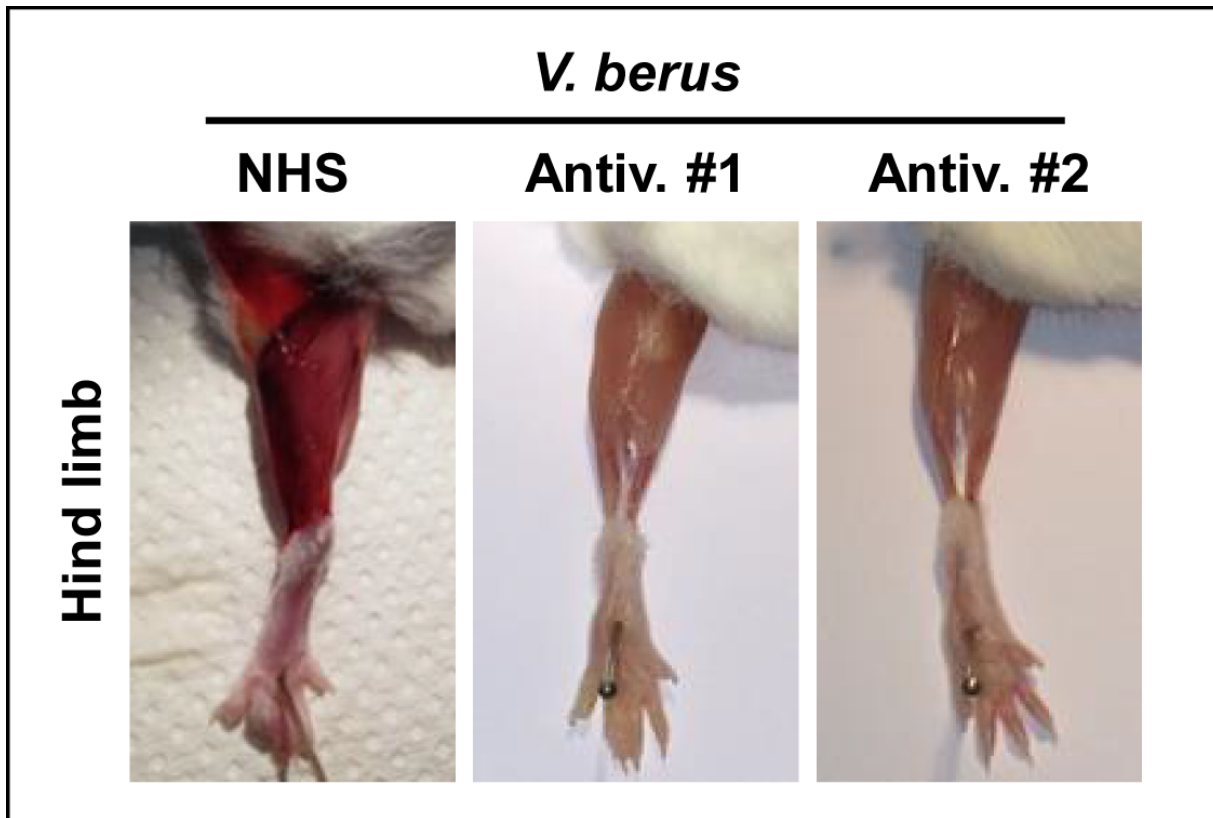

**Fig S4. Antivenoms neutralize the haemorrhagic effect of *V. berus* venom.** *V. berus* venom (100 µg/Kg) pre-incubated with NHS or Antivenom #1 or Antivenom #2 was injected at the level of the hind paw. After 48 hours the limb was skinned and the haemorrhagic effect evaluated.

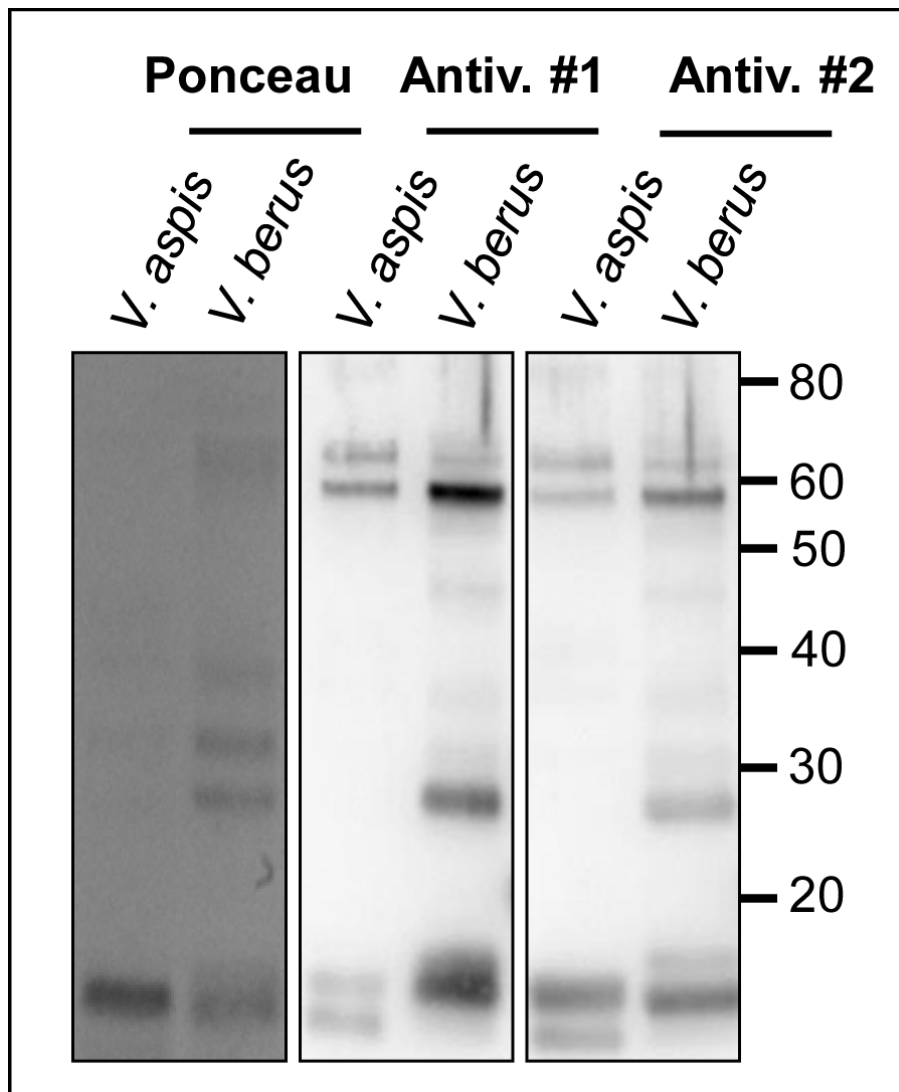

**Fig S5. Western blotting analysis of whole venoms with antisera.** 0.75  $\mu\text{g}$ /well of *V. aspis* or of *V. berus* venom were separated in a reducing SDS-PAGE and then transferred on a nitrocellulose membrane for immunoblotting. Red Ponceau staining shows the composition of whole venoms. Antivenom #1 recognizes very poorly *V. aspis* venom, especially the PLA<sub>2</sub> component which is the most abundant component. Antivenom #2 displays a slightly higher affinity for the PLA<sub>2</sub> component of *V. aspis* venom. Both sera have higher affinity for *V. berus* than *V. aspis* venom.

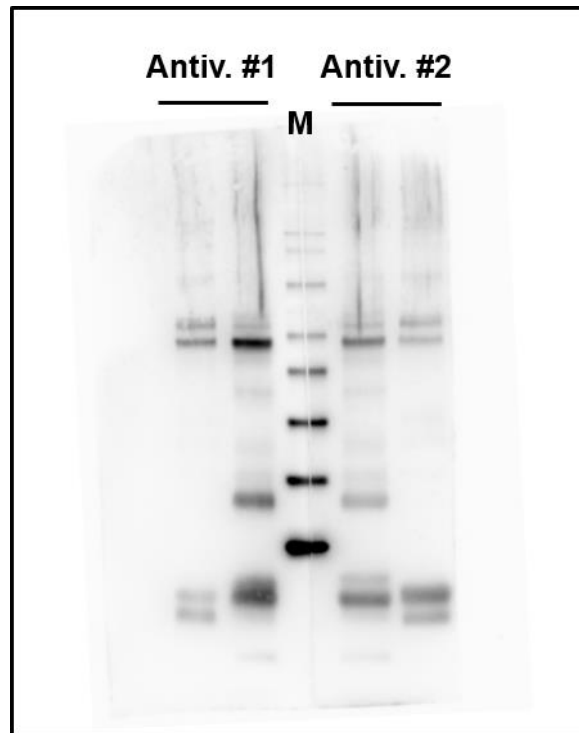

**Fig S6. Non-cropped membranes of figure S5.** The whole membrane was cut into two membranes with scissors after red Ponceau staining and incubated with indicated antivenoms. Please note that in Figure S5 the membrane of antivenom #2 is vertically flipped. Molecular weights of the marker are indicated in Figure S5.
